# Supplementary material for: Hierarchically nanostructured MnO2 electrodes for pseudocapacitor application
Source: Royal Society of Chemistry journal article supplement (doi:10.1039/c6ra22841k), 2016-01-01
Supplement: c6ra22841k1.pdf [file c6ra22841k1.pdf]

Electronic Supplementary Information

# **Hierarchically nanostructured MnO<sub>2</sub> electrodes for pseudocapacitor application**

*Ilhwan Ryu<sup>a</sup>, Green Kim<sup>a</sup>, Hajin Yoon<sup>a</sup>, Sang Jung Ahn<sup>b</sup>, Sanggyu Yim<sup>a</sup>*

<sup>a</sup>Department of Chemistry, Kookmin University, Seoul 136-702, South Korea.

<sup>b</sup>Korea Research Institute of Standard and Science, Daejeon 305-340, South Korea

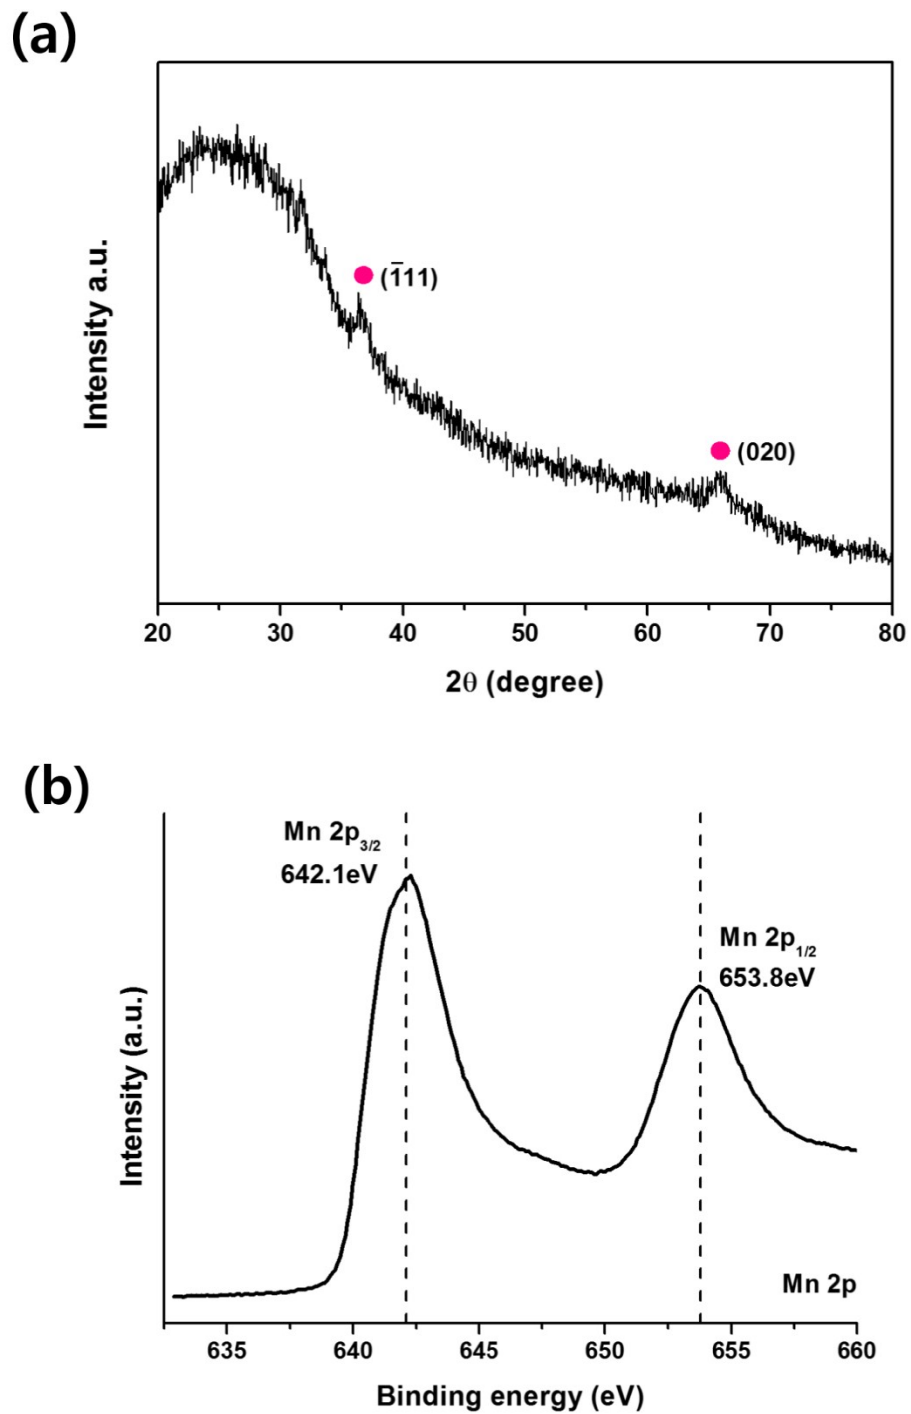

**Figure S1.** (a) Powder X-ray diffraction pattern and (b) X-ray photoelectron spectrum of the electrodeposited MnO<sub>2</sub> thin film. The diffraction peaks indexed in (a) are consistent with standard data for MnO<sub>2</sub> from JCPDS no. 44-014.

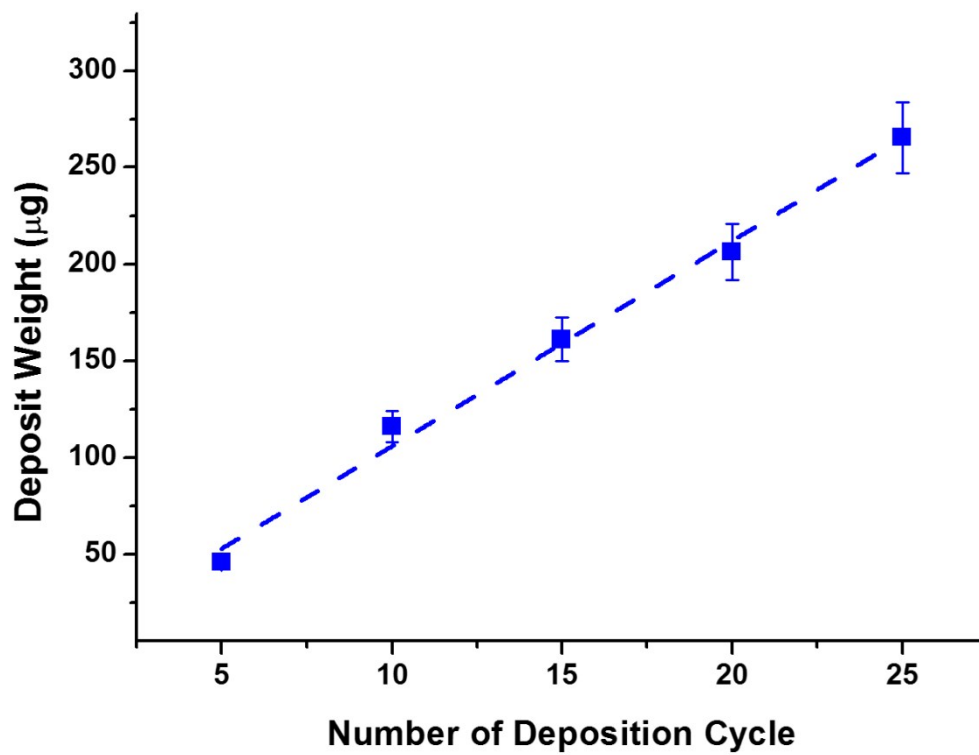

**Figure S2.** Plots of deposit weights of  $\text{MnO}_2$  for the hierarchically nanostructured electrodes as a function of the number of electrodeposition cycles.

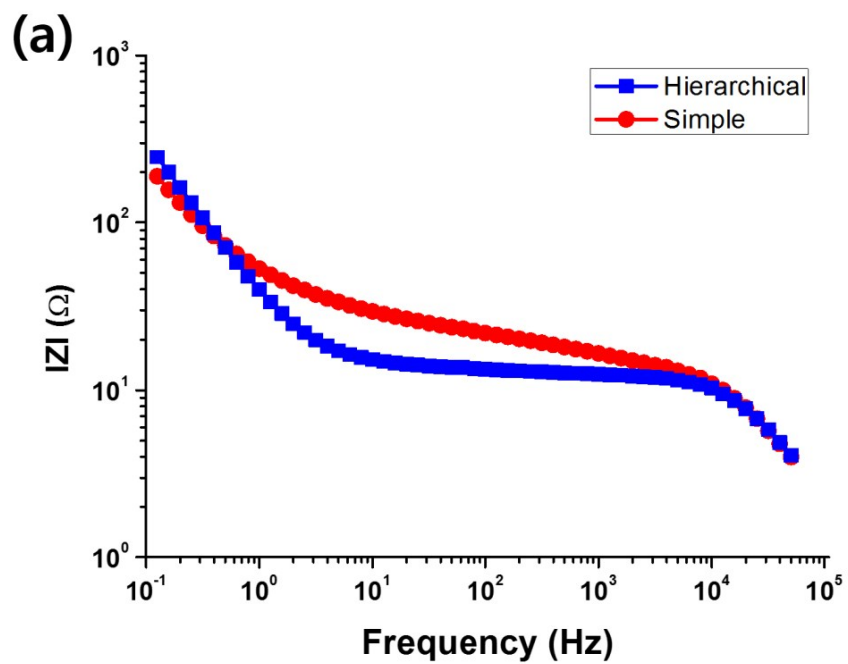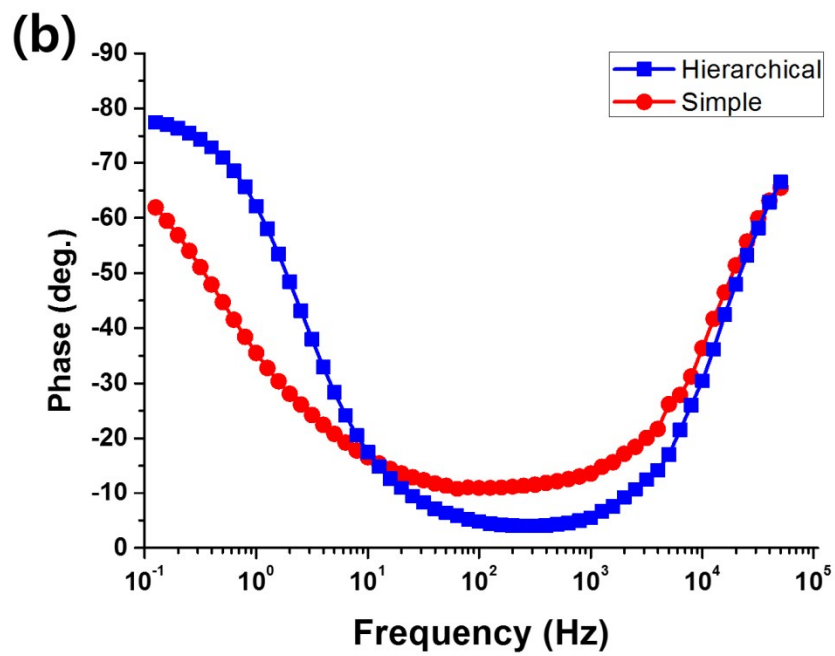

**Figure S3.** (a) Bode  $|Z|$  and (b) Bode angle plots of the hierarchical and simple  $\text{MnO}_2$  nanostructure electrodes.

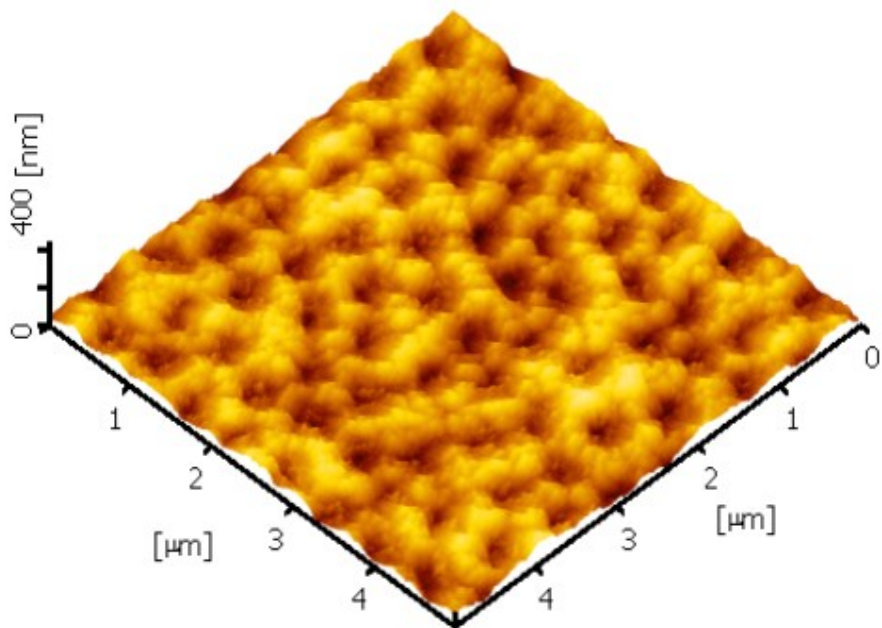

**Figure S4.** AFM image of the hierarchical MnO<sub>2</sub> nanostructure. The number of electrodeposition cycle is 15.

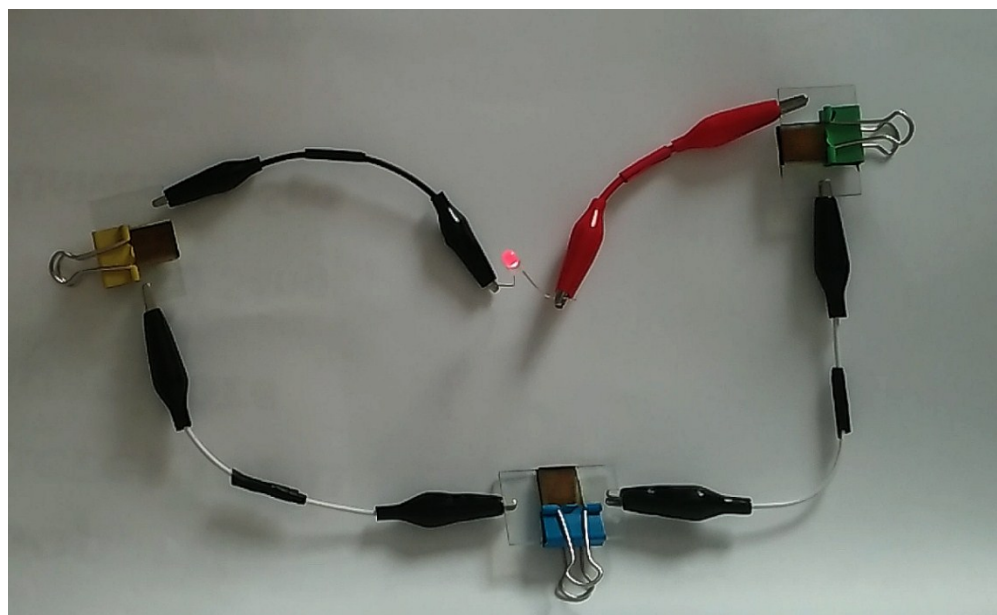

**Figure S5.** A photograph of a red LED lightened by three asymmetric supercapacitor units connected in series. Each unit consists of activated carbon electrode based half-cell and hierarchical MnO<sub>2</sub> nanostructure electrode based half-cell.
